# Supplementary material for: Selective hydrogenation of succinic acid to gamma-butyrolactone with PVP-capped CuPd catalysts
Source: Royal Society of Chemistry journal article supplement (doi:10.1039/d1cy01735g), 2021-11-08
Supplement: d1cy01735g1.pdf [file d1cy01735g1.pdf]

**Electronic Supplementary Information**

**Selective hydrogenation of succinic acid to  
gamma-butyrolactone with PVP-capped CuPd  
catalysts**

Son Dinh Le, Shun Nishimura\*

*Graduate School of Advanced Science and Technology, Japan Advanced Institute of Science and  
Technology (JAIST), 1-1 Asahidai, Nomi, Ishikawa 923-1292, Japan*

\*Corresponding author. Email: s\_nishim@jaist.ac.jp

Number of Page: 8

Number of Figures: 9

Number of Tables: 3

**Table S1:** List of chemicals

| Chemical name                   | Formula                                                              | Mw /g mol <sup>-1</sup> | Supplier   |
|---------------------------------|----------------------------------------------------------------------|-------------------------|------------|
| Butyric acid                    | C <sub>4</sub> H <sub>8</sub> O <sub>2</sub>                         | 88.11                   | Aldrich    |
| Copper (II) acetate monohydrate | Cu(CO <sub>2</sub> CH <sub>3</sub> ) <sub>2</sub> · H <sub>2</sub> O | 199.65                  | Wako       |
| γ-Butyrolactone                 | C <sub>4</sub> H <sub>6</sub> O <sub>2</sub>                         | 86.09                   | Aldrich    |
| Hydroxyapatite (HAP)            | Ca <sub>10</sub> (PO <sub>4</sub> ) <sub>6</sub> (OH) <sub>2</sub>   | 502.31                  | Kanto      |
| Palladium acetate               | Pd(CH <sub>3</sub> COO) <sub>2</sub>                                 | 224.51                  | Wako       |
| Polyvinyl alcohol (PVA)         | (C <sub>2</sub> H <sub>4</sub> O) <sub>n</sub>                       | 3500                    | Wako       |
| Polyvinylpyrrolidone (PVP, K12) | (C <sub>6</sub> H <sub>9</sub> NO) <sub>n</sub>                      | 3500                    | Acros Org. |
| PVP (K16–18)                    | (C <sub>6</sub> H <sub>9</sub> NO) <sub>n</sub>                      | 8000                    | Acros Org. |
| PVP (K30)                       | (C <sub>6</sub> H <sub>9</sub> NO) <sub>n</sub>                      | 40000                   | Kanto      |
| PVP (K29–32)                    | (C <sub>6</sub> H <sub>9</sub> NO) <sub>n</sub>                      | 58000                   | Acros Org. |
| PVP (K90)                       | (C <sub>6</sub> H <sub>9</sub> NO) <sub>n</sub>                      | 360000                  | Acros Org. |
| Starch, soluble                 | (C <sub>6</sub> H <sub>10</sub> O <sub>5</sub> ) <sub>n</sub>        | -                       | Kanto      |
| Succinic acid                   | C <sub>4</sub> H <sub>6</sub> O <sub>4</sub>                         | 118.09                  | Kanto      |
| 1,4-Butanediol                  | C <sub>4</sub> H <sub>10</sub> O <sub>2</sub>                        | 90.12                   | Wako       |
| 1,4-Dioxane                     | C <sub>4</sub> H <sub>8</sub> O <sub>2</sub>                         | 88.11                   | Wako       |
| 1-Ethyl-2-pyrrolidone           | C <sub>6</sub> H <sub>11</sub> NO                                    | 113.16                  | Acros Org. |
| 1-Vinyl-2-pyrrolidone           | C <sub>6</sub> H <sub>9</sub> NO                                     | 111.14                  | Aldrich    |
| 2-Ethoxyethanol                 | C <sub>4</sub> H <sub>10</sub> O <sub>2</sub>                        | 90.12                   | Wako       |

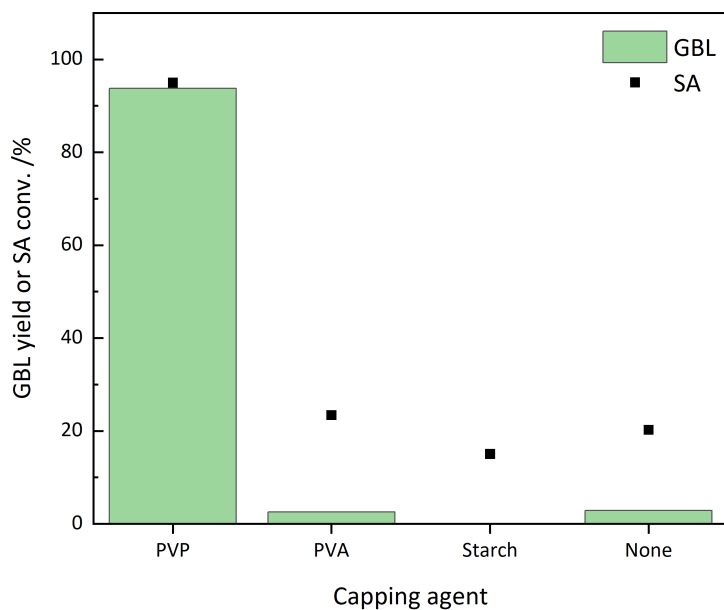

**Fig. S1:** Influence of different capping agents on the catalytic performance of HAP supported  $\text{Cu}_{40}\text{Pd}_{60}$  catalyst. Reaction conditions: SA (0.1 g),  $\text{Cu}_{40}\text{Pd}_{60}$ -Polymer/HAP (0.1 g), 1,4-dioxane (10 mL), temperature (200 °C),  $\text{H}_2$  pressure (8 MPa), reaction time (48 h).

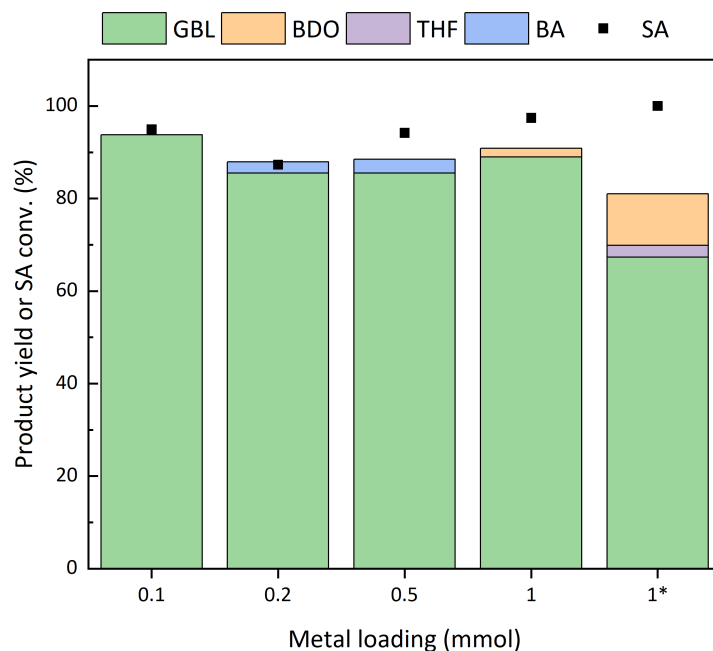

**Fig. S2:** Influence of metal loading on the activity of the  $\text{Cu}_{40}\text{Pd}_{60}$ -PVP/HAP catalyst. Reaction conditions: SA (0.1 g), catalyst (0.1 g), 1,4-dioxane (10 mL), temperature (200 °C),  $\text{H}_2$  pressure (8 MPa), reaction time (48 h), \*catalyst (0.2 g).

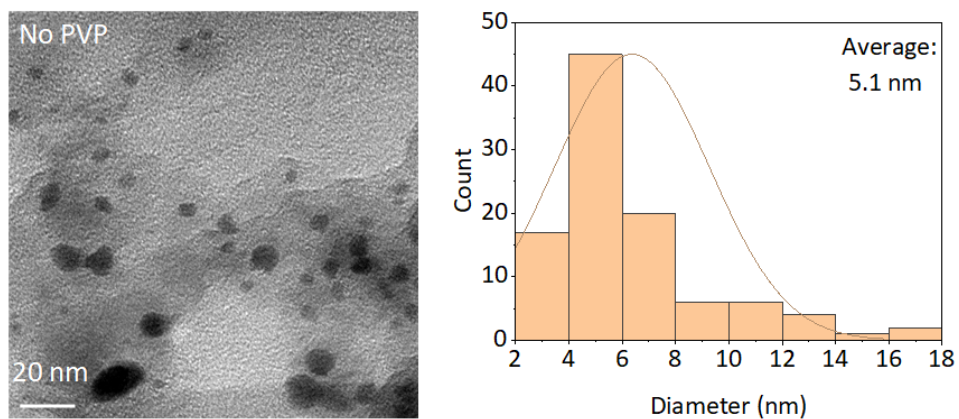

**Fig. S3:** TEM image of the  $\text{Cu}_{40}\text{Pd}_{60}/\text{HAP}$  catalyst (no capping agent)

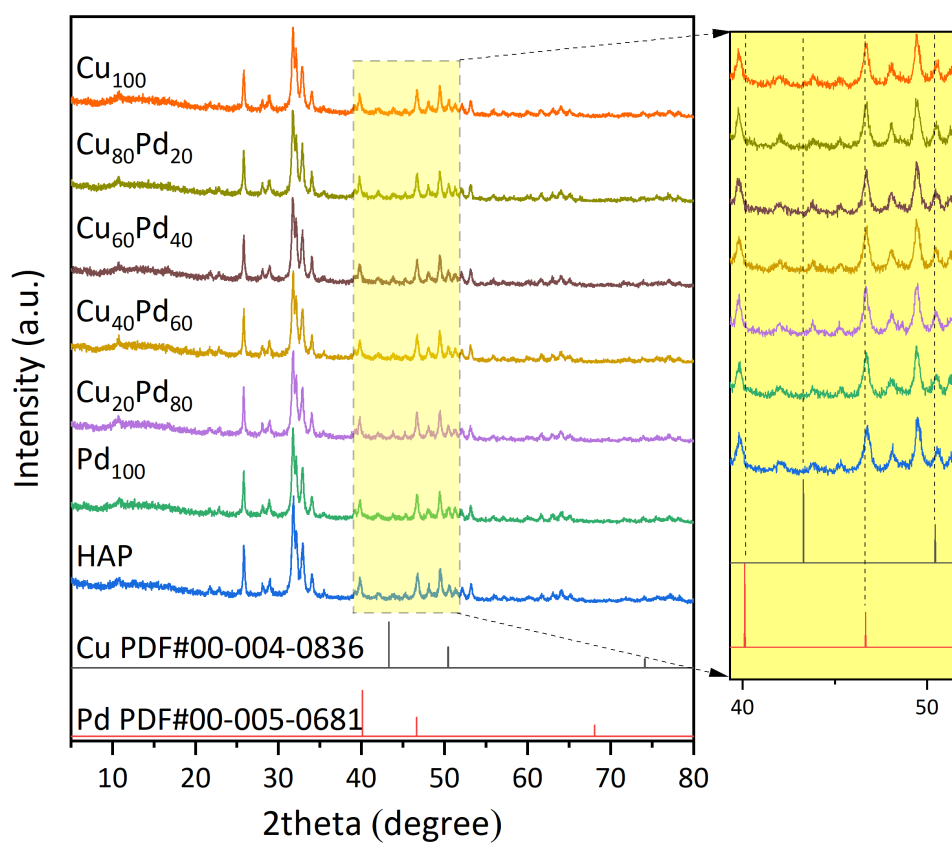

**Fig. S4:** XRD patterns of the  $\text{Cu}_x\text{Pd}_y\text{-PVP}/\text{HAP}$  catalysts

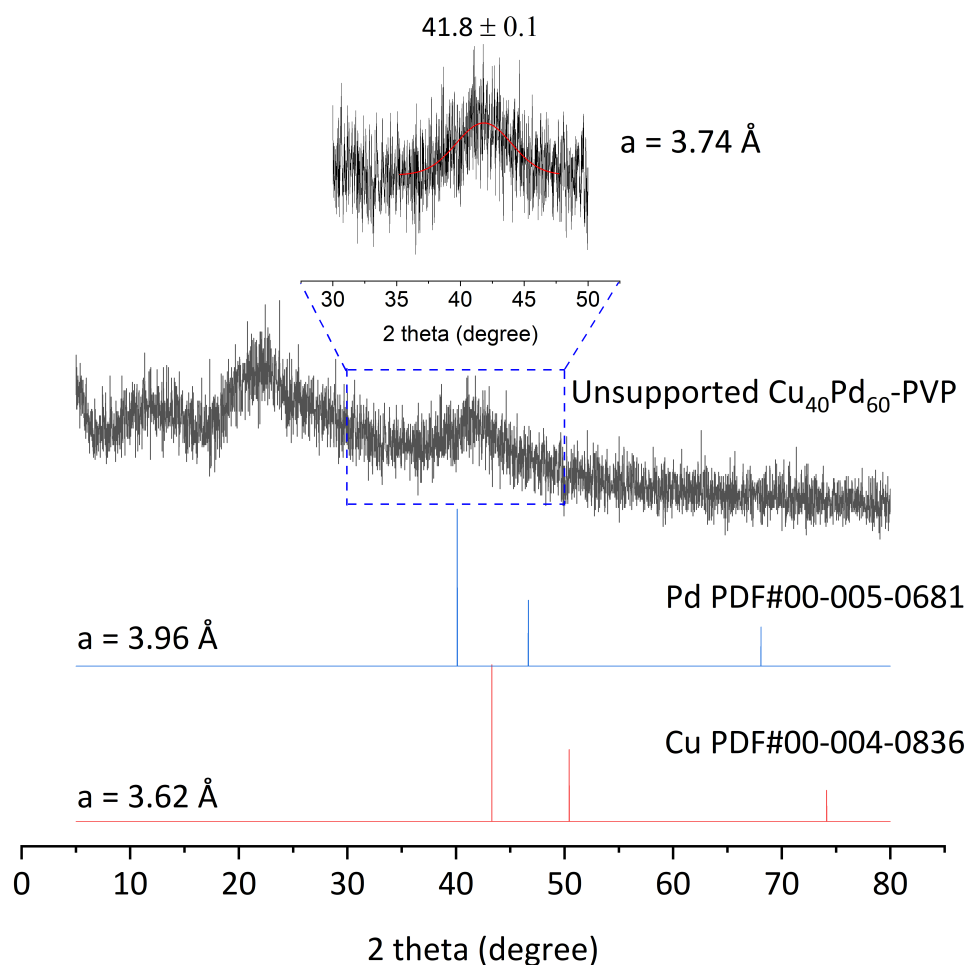

**Fig. S5:** XRD patterns of the unsupported PVP-capped  $\text{Cu}_{40}\text{Pd}_{60}$  sample. The lattice parameter (a) was determined by using the Bragg's law.

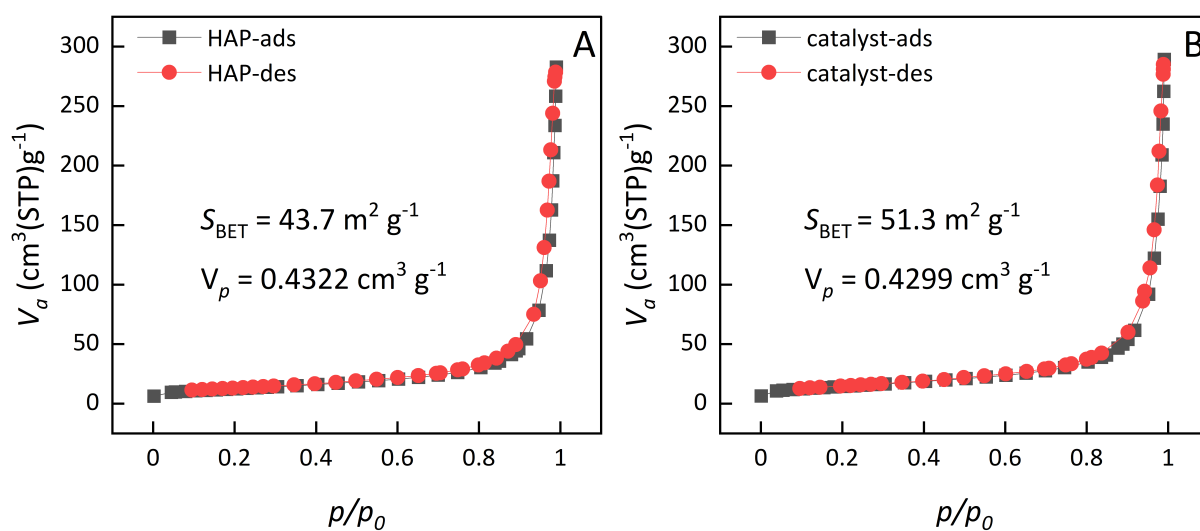

**Fig. S6:**  $\text{N}_2$  adsorption/desorption isotherms of (A) the HAP support and (B)  $\text{Cu}_{40}\text{Pd}_{60}$ -PVP/HAP catalyst.

**Table S2:** Binding energy of the  $\text{Cu}_x\text{Pd}_y$ -PVP/HAP catalysts at Cu  $2p_{3/2}$  and Pd  $3d_{5/2}$  regions

| Catalyst                          | Cu $2p_{3/2}$   |                  | Cu $2p_{1/2}$   |                  | Pd $3d_{5/2}$   |                  | Pd $3d_{3/2}$   |                  |
|-----------------------------------|-----------------|------------------|-----------------|------------------|-----------------|------------------|-----------------|------------------|
|                                   | Cu <sup>0</sup> | Cu <sup>2+</sup> | Cu <sup>0</sup> | Cu <sup>2+</sup> | Pd <sup>0</sup> | Pd <sup>2+</sup> | Pd <sup>0</sup> | Pd <sup>2+</sup> |
| Cu <sub>100</sub>                 | 933.2           | 935.1            | 952.9           | 955.3            | -               | -                | -               | -                |
| Cu <sub>80</sub> Pd <sub>20</sub> | 933.1           | 935.5            | 952.8           | 955.0            | 335.1           | 336.9            | 340.2           | 341.4            |
| Cu <sub>60</sub> Pd <sub>40</sub> | 933.0           | 935.8            | 952.8           | 955.6            | 334.9           | 336.2            | 340.1           | 341.2            |
| Cu <sub>40</sub> Pd <sub>60</sub> | 932.8           | -                | 952.6           | -                | 334.9           | -                | 340.2           | -                |
| Cu <sub>20</sub> Pd <sub>80</sub> | 933.2           | -                | 953.5           | -                | 335.0           | 336.6            | 340.3           | 341.5            |
| Pd <sub>100</sub>                 | -               | -                | -               | -                | 334.6           | 335.7            | 339.9           | 340.9            |

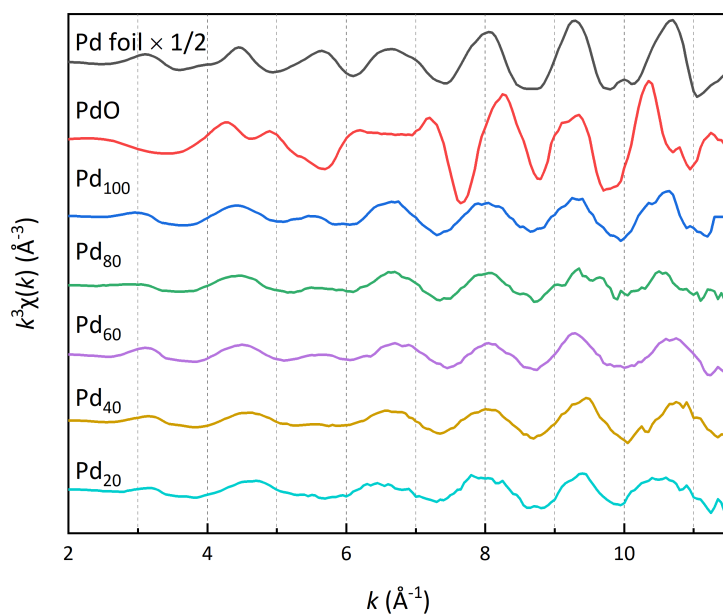**Fig. S7:**  $k^3$ -weighted EXAFS spectra of the  $\text{Cu}_x\text{Pd}_y$ -PVP/HAP catalysts and references at Pd K-edge**Table S3:** EXAFS fitting results at Pd K-edge for the fresh and used Cu<sub>40</sub>Pd<sub>60</sub>-PVP/HAP catalysts

| Sample | CN <sub>Pd-Pd</sub> | CN <sub>Pd-Cu</sub> | R <sub>Pd-Pd</sub> ( $\text{\AA}$ ) | R <sub>Pd-Cu</sub> ( $\text{\AA}$ ) |
|--------|---------------------|---------------------|-------------------------------------|-------------------------------------|
| Fresh  | $4.7 \pm 0.6$       | $1.4 \pm 0.5$       | $2.7051 \pm 0.0098$                 | $2.6612 \pm 0.0295$                 |
| Used   | $2.7 \pm 0.6$       | $2.2 \pm 0.5$       | $2.6844 \pm 0.0111$                 | $2.6069 \pm 0.0111$                 |

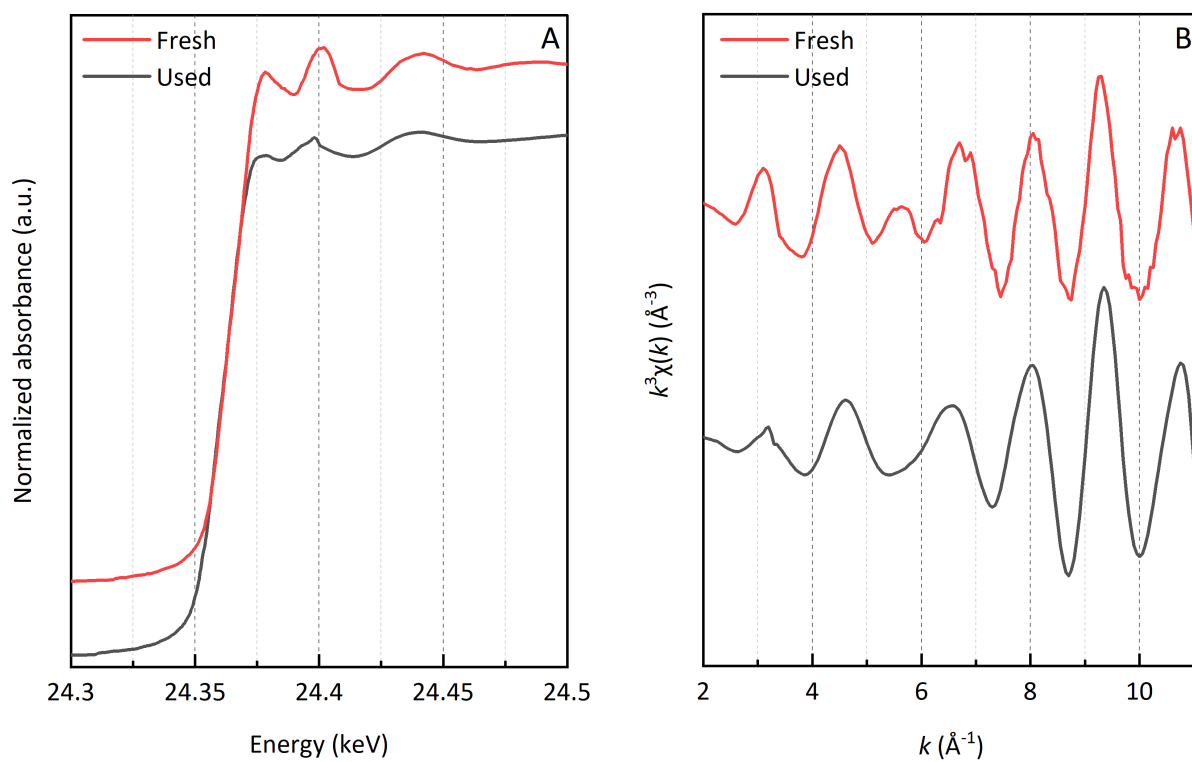

**Fig. S8:** (A) XANES features and (B)  $k^3$ -weighted EXAFS spectra at Pd K-edge of the fresh and used  $\text{Cu}_{40}\text{Pd}_{60}$ -PVP/HAP catalysts

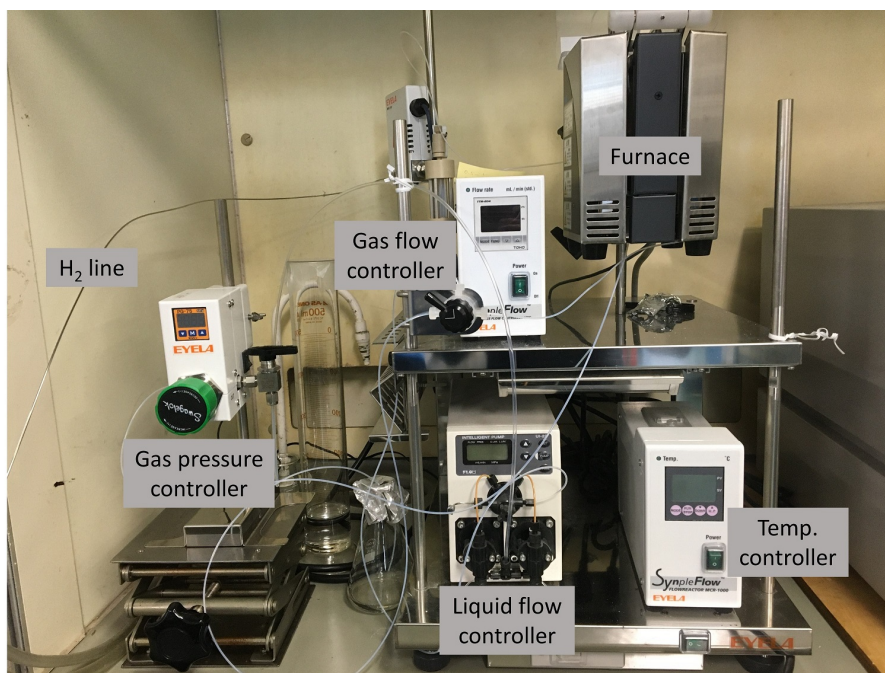

**Fig. S9:** Flow reactor system used in this study

*Note:* Continuous reactions were carried out in a down-flow fixed-bed reactor system (MCR-1000, EYELA, Tokyo, Japan). The catalyst (0.5 g) was loaded into a stainless steel tube ( $\phi = 5$  mm) and secured in place by bed filters at both ends. The liquid and hydrogen flow rates were set at 0.3 and 10 mL min<sup>-1</sup>, respectively. The reactor was pressurized with pure H<sub>2</sub> (99.999%) to 0.5 MPa and then the temperature of the furnace was increased to 200 °C. The reaction mixture was collected at hourly intervals and analyzed by GC.
